# Supplementary material for: Circulating Bile Acids and Adenoma Recurrence in the Context of Adherence to a High-Fiber, High-Fruit and Vegetable, and Low-Fat Dietary Intervention
Source: PubMed Central journal article supplement (PMC9624497; doi:10.14309/ctg.0000000000000533), 2022-09-16
Supplement: ct9-13-e00533-s001.pdf [file ct9-13-e00533-s001.pdf]

**Supplemental Table 1.** Pearson correlations<sup>a</sup> for circulating bile acids at baseline in the Polyp Prevention Trial, 1991-1998 (N= 170 super-compliers and N=198 goal-achieving controls)

|      | CDA     | CA      | DA      | GCDA    | GCA     | GDA     | GLA     | GUDA    | LA      | TCDA    | TCA     | TDA     | UDA     | TBA     | PBA     |
|------|---------|---------|---------|---------|---------|---------|---------|---------|---------|---------|---------|---------|---------|---------|---------|
| CDA  |         |         |         |         |         |         |         |         |         |         |         |         |         |         |         |
| CA   | 0.83*** |         |         |         |         |         |         |         |         |         |         |         |         |         |         |
| DA   | 0.27*** | 0.23*** |         |         |         |         |         |         |         |         |         |         |         |         |         |
| GCD  |         |         |         |         |         |         |         |         |         |         |         |         |         |         |         |
| A    | 0.47*** | 0.40*** | 0.11*   |         |         |         |         |         |         |         |         |         |         |         |         |
| GCA  | 0.37*** | 0.36*** | 0.19*** | 0.85*** |         |         |         |         |         |         |         |         |         |         |         |
| GDA  | 0.06    | 0.09    | 0.71*** | 0.53*** | 0.57*** |         |         |         |         |         |         |         |         |         |         |
| GLA  | -0.09   | -0.04   | 0.52*** | 0.24*** | 0.22*** | 0.63*** |         |         |         |         |         |         |         |         |         |
| GUD  |         |         |         |         |         |         |         |         |         |         |         |         |         |         |         |
| A    | 0.48*** | 0.32*** | 0.10    | 0.72*** | 0.60*** | 0.33*** | 0.06    |         |         |         |         |         |         |         |         |
| LA   | -0.08   | -0.04   | 0.57*** | -0.04   | 0.03    | 0.45*** | 0.69*** | -0.13*  |         |         |         |         |         |         |         |
| TCDA | 0.33*** | 0.25*** | 0.01    | 0.85*** | 0.81*** | 0.46*** | 0.12*   | 0.58*** | -0.06   |         |         |         |         |         |         |
| TCA  | 0.23*** | 0.21*** | 0.09    | 0.71*** | 0.89*** | 0.49*** | 0.15**  | 0.45*** | 0.01    | 0.88*** |         |         |         |         |         |
| TDA  | -0.03   | -0.02   | 0.53*** | 0.47*** | 0.55*** | 0.84*** | 0.46*** | 0.28*** | 0.32*** | 0.63*** | 0.63*** |         |         |         |         |
| UDA  | 0.67*** | 0.44*** | 0.28*** | 0.31*** | 0.22*** | 0.05    | -0.06   | 0.68*** | -0.08   | 0.17*** | 0.10    | -0.04   |         |         |         |
| TBA  | 0.69*** | 0.61*** | 0.45*** | 0.84*** | 0.81*** | 0.57*** | 0.25*** | 0.66*** | 0.11*   | 0.69*** | 0.66*** | 0.47*** | 0.48*** |         |         |
| PBA  | 0.74*** | 0.70*** | 0.23*** | 0.88*** | 0.82*** | 0.43*** | 0.15**  | 0.66*** | -0.02   | 0.76*** | 0.68*** | 0.37*** | 0.45*** | 0.94*** |         |
| SBA  | 0.18*** | 0.17*** | 0.91*** | 0.36*** | 0.43*** | 0.92*** | 0.64*** | 0.22*** | 0.58*** | 0.28*** | 0.35*** | 0.74*** | 0.16**  | 0.58*** | 0.38*** |

<sup>a</sup> \*, \*\*, \*\*\* indicate that p-values for spearman correlations were <0.05, <0.01, and <0.001, respectively

Abbreviations: CDA, Chenodeoxycholic acid; CA, Cholic acid; DA, Deoxycholic acid, GCDA, Glycochenodeoxycholic acid; GCA, Glycocholic acid; GDA, Glycodeoxycholic acid; GLA, Glycolithocholic acid; GUDA, Glycoursodeoxycholic acid; LA, Lithocholic acid; TCDA, Taurochenodeoxycholic acid; TCA, Taurocholic acid; TDA, Taurodeoxycholic acid; UDA, Ursodeoxycholic acid; TBA, Total Bile Acids; PBA, Primary Bile Acids; SBA, Secondary Bile Acids.

**Supplemental Table 2.** Associations<sup>a</sup> of individual bile acid concentrations at baseline with recurrent adenoma in the Polyp Prevention Trial, 1991-1998

| Bile acid concentrations, ng/mL   | N   | Overall, N= 368   | Female, N=150     | Male, N=218       |
|-----------------------------------|-----|-------------------|-------------------|-------------------|
|                                   |     | OR (95% CI)       | OR (95% CI)       | OR (95% CI)       |
| <b>Chenodeoxycholic acid</b>      |     |                   |                   |                   |
| Continuous <sup>b</sup>           | 368 | 1.07 (0.96, 1.19) | 0.96 (0.80, 1.15) | 1.12 (0.96, 1.31) |
| Tertile 1                         | 123 | 1.00              | 1.00              | 1.00              |
| Tertile 2                         | 122 | 0.89 (0.48, 1.64) | 0.82 (0.27, 2.42) | 0.72 (0.30, 1.69) |
| Tertile 3                         | 123 | 1.27 (0.69, 2.35) | 0.48 (0.14, 1.51) | 1.42 (0.62, 3.31) |
| P-trend <sup>c</sup>              |     | 0.54              | 0.63              | 0.31              |
| <b>Cholic acid</b>                |     |                   |                   |                   |
| Continuous <sup>b</sup>           | 368 | 1.02 (0.92, 1.12) | 0.86 (0.70, 1.03) | 1.09 (0.95, 1.24) |
| Tertile 1                         | 123 | 1.00              | 1.00              | 1.00              |
| Tertile 2                         | 122 | 0.85 (0.46, 1.54) | 0.88 (0.31, 2.45) | 0.75 (0.33, 1.69) |
| Tertile 3                         | 123 | 1.07 (0.59, 1.94) | 0.47 (0.14, 1.49) | 1.33 (0.60, 2.92) |
| P-trend <sup>c</sup>              |     | 0.74              | 0.63              | 0.43              |
| <b>Deoxycholic acid</b>           |     |                   |                   |                   |
| Continuous <sup>b</sup>           | 368 | 1.09 (0.93, 1.29) | 1.17 (0.86, 1.63) | 1.05 (0.86, 1.29) |
| Tertile 1                         | 123 | 1.00              | 1.00              | 1.00              |
| Tertile 2                         | 122 | 0.81 (0.44, 1.47) | 0.71 (0.24, 2.10) | 0.89 (0.41, 1.95) |
| Tertile 3                         | 123 | 1.17 (0.65, 2.11) | 1.38 (0.48, 4.06) | 1.14 (0.53, 2.47) |
| P-trend <sup>c</sup>              |     | 0.69              | 0.64              | 0.74              |
| <b>Glycochenodeoxycholic acid</b> |     |                   |                   |                   |
| Continuous <sup>b</sup>           | 368 | 1.19 (1.00, 1.42) | 1.12 (0.83, 1.52) | 1.18 (0.94, 1.50) |
| Tertile 1                         | 123 | 1.00              | 1.00              | 1.00              |
| Tertile 2                         | 122 | 1.70 (0.92, 3.18) | 2.16 (0.76, 6.35) | 1.51 (0.65, 3.61) |
| Tertile 3                         | 123 | 2.02 (1.09, 3.81) | 1.23 (0.36, 4.00) | 2.24 (0.99, 5.20) |
| P-trend <sup>c</sup>              |     | 0.32              | 0.85              | 0.20              |
| <b>Glycocholic acid</b>           |     |                   |                   |                   |
| Continuous <sup>b</sup>           | 368 | 1.18 (1.02, 1.38) | 1.11 (0.84, 1.46) | 1.23 (1.00, 1.51) |
| Tertile 1                         | 123 | 1.00              | 1.00              | 1.00              |
| Tertile 2                         | 122 | 1.09 (0.59, 2.02) | 1.26 (0.42, 3.76) | 0.83 (0.36, 1.92) |
| Tertile 3                         | 123 | 2.09 (1.16, 3.81) | 1.18 (0.38, 3.67) | 2.51 (1.13, 5.67) |
| P-trend <sup>c</sup>              |     | 0.13              | 0.85              | <0.001            |
| <b>Glycodeoxycholic acid</b>      |     |                   |                   |                   |
| Continuous <sup>b</sup>           | 368 | 1.13 (0.99, 1.31) | 1.29 (0.99, 1.74) | 1.07 (0.91, 1.28) |
| Tertile 1                         | 123 | 1.00              | 1.00              | 1.00              |
| Tertile 2                         | 122 | 0.93 (0.52, 1.66) | 0.94 (0.33, 2.65) | 0.86 (0.40, 1.84) |
| Tertile 3                         | 123 | 1.07 (0.60, 1.93) | 1.70 (0.56, 5.28) | 0.82 (0.38, 1.74) |
| P-trend <sup>c</sup>              |     | 0.81              | 0.63              | 0.74              |
| <b>Glycolithocholic acid</b>      |     |                   |                   |                   |
| Continuous <sup>b</sup>           | 368 | 0.95 (0.85, 1.06) | 1.02 (0.83, 1.24) | 0.95 (0.83, 1.10) |
| Tertile 1                         | 123 | 1.00              | 1.00              | 1.00              |
| Tertile 2                         | 122 | 0.71 (0.39, 1.29) | 0.32 (0.08, 1.14) | 0.85 (0.39, 1.82) |

|                            |     |                   |                    |                   |
|----------------------------|-----|-------------------|--------------------|-------------------|
| Tertile 3                  | 123 | 0.93 (0.52, 1.67) | 1.07 (0.37, 3.10)  | 0.80 (0.37, 1.72) |
| P-trend <sup>c</sup>       |     | 0.81              | 0.63               | 0.74              |
| Glycoursodeoxycholic acid  |     |                   |                    |                   |
| Continuous <sup>b</sup>    | 368 | 1.14 (1.01, 1.30) | 1.07 (0.86, 1.34)  | 1.15 (0.97, 1.37) |
| Tertile 1                  | 123 | 1.00              | 1.00               | 1.00              |
| Tertile 2                  | 122 | 1.68 (0.93, 3.05) | 2.75 (0.93, 8.56)  | 1.28 (0.59, 2.80) |
| Tertile 3                  | 123 | 1.53 (0.84, 2.82) | 1.00 (0.32, 3.09)  | 1.62 (0.74, 3.58) |
| P-trend <sup>c</sup>       |     | 0.54              | 0.85               | 0.46              |
| Lithocholic acid           |     |                   |                    |                   |
| Continuous <sup>b</sup>    | 368 | 0.95 (0.84, 1.08) | 0.97 (0.77, 1.26)  | 0.94 (0.81, 1.10) |
| Tertile 1                  | 123 | 1.00              | 1.00               | 1.00              |
| Tertile 2                  | 122 | 0.88 (0.48, 1.62) | 0.44 (0.13, 1.39)  | 1.34 (0.61, 2.98) |
| Tertile 3                  | 123 | 0.94 (0.52, 1.68) | 1.32 (0.46, 3.89)  | 0.77 (0.35, 1.67) |
| P-trend <sup>c</sup>       |     | 0.89              | 0.63               | 0.53              |
| Taurochenodeoxycholic acid |     |                   |                    |                   |
| Continuous <sup>b</sup>    | 368 | 1.16 (1.00, 1.35) | 1.13 (0.87, 1.47)  | 1.13 (0.92, 1.39) |
| Tertile 1                  | 123 | 1.00              | 1.00               | 1.00              |
| Tertile 2                  | 122 | 1.62 (0.88, 3.00) | 2.02 (0.67, 6.29)  | 1.33 (0.60, 2.95) |
| Tertile 3                  | 123 | 1.62 (0.88, 3.01) | 1.79 (0.56, 5.77)  | 1.54 (0.69, 3.51) |
| P-trend <sup>c</sup>       |     | 0.54              | 0.64               | 0.53              |
| Taurocholic acid           |     |                   |                    |                   |
| Continuous <sup>b</sup>    | 368 | 1.14 (1.00, 1.31) | 1.05 (0.84, 1.32)  | 1.19 (0.99, 1.44) |
| Tertile 1                  | 123 | 1.00              | 1.00               | 1.00              |
| Tertile 2                  | 122 | 1.54 (0.84, 2.84) | 4.64 (1.54, 15.22) | 1.00 (0.44, 2.27) |
| Tertile 3                  | 123 | 1.58 (0.87, 2.89) | 0.77 (0.21, 2.73)  | 2.11 (0.96, 4.75) |
| P-trend <sup>c</sup>       |     | 0.54              | 0.63               | 0.20              |
| Taurodeoxycholic acid      |     |                   |                    |                   |
| Continuous <sup>b</sup>    | 368 | 1.09 (0.99, 1.21) | 1.20 (0.99, 1.49)  | 1.04 (0.92, 1.19) |
| Tertile 1                  | 123 | 1.00              | 1.00               | 1.00              |
| Tertile 2                  | 122 | 1.05 (0.58, 1.89) | 1.42 (0.45, 4.57)  | 1.03 (0.48, 2.19) |
| Tertile 3                  | 123 | 1.25 (0.69, 2.26) | 1.76 (0.58, 5.60)  | 1.05 (0.48, 2.28) |
| P-trend <sup>c</sup>       |     | 0.69              | 0.63               | 0.92              |
| Ursodeoxycholic acid       |     |                   |                    |                   |
| Continuous <sup>b</sup>    | 368 | 1.06 (0.99, 1.14) | 0.98 (0.87, 1.10)  | 1.10 (0.99, 1.22) |
| Tertile 1                  | 123 | 1.00              | 1.00               | 1.00              |
| Tertile 2                  | 122 | 1.37 (0.75, 2.52) | 1.66 (0.61, 4.68)  | 0.99 (0.43, 2.25) |
| Tertile 3                  | 123 | 1.62 (0.89, 2.98) | 0.72 (0.22, 2.31)  | 1.89 (0.88, 4.17) |
| P-trend <sup>c</sup>       |     | 0.54              | 0.63               | 0.20              |

<sup>a</sup> Covariates in the multivariable logistic regression models included: age at randomization, sex (female or male), intervention arm (control arm or intervention arm), baseline BMI, baseline adenoma characteristics (advanced/multiple or early adenoma), adenoma characteristics at year 1 (advanced/multiple, hyperplastic, early adenoma, or no polyp), education (college graduate vs. post-graduate college), recruitment center (CA, NY/PA/IL/NC/VA, UT), baseline smoking status (current smoker, former smoker, or never regular smoker), family history of colorectal cancer (yes, no, or missing), NSAID/Aspirin use (yes or no), and baseline total energy, alcohol, red/processed meat, and fiber intakes

<sup>b</sup> Continuous bile acids were log<sub>2</sub> transformed

<sup>c</sup> P-trends were adjusted for multiple testing using False-Discovery Rate correction using the Benjamin-Hochberg method

Abbreviations: BMI, Body mass Index; CA, California; CI, confidence interval; IL, Illinois; NC, North Carolina; NY, New York; OR, odds ratios; PA, Pennsylvania; UT, Utah; VA, Virginia; NSAID, non-steroidal anti-inflammatory drug



|                                   |     |                   |     |                   |     |                   |     |                   |     |                   |
|-----------------------------------|-----|-------------------|-----|-------------------|-----|-------------------|-----|-------------------|-----|-------------------|
| Continuous <sup>d</sup>           | 129 | 1.09 (0.92, 1.29) | 111 | 0.76 (0.64, 0.91) | 172 | 1.10 (0.93, 1.29) | 301 | 1.20 (1.00, 1.45) | 325 | 1.02 (0.87, 1.19) |
| Tertile 1                         | 35  | 1.00              | 39  | 1.00              | 57  | 1.00              | 8   | 1.00              | 23  | 1.00              |
| Tertile 2                         | 46  | 1.01 (0.52, 1.96) | 40  | 0.43 (0.22, 0.87) | 58  | 1.86 (1.00, 3.47) | 20  | 3.38 (2.13, 5.37) | 22  | 1.15 (0.58, 2.29) |
| Tertile 3                         | 48  | 1.26 (0.67, 2.38) | 32  | 0.35 (0.17, 0.71) | 57  | 1.28 (0.68, 2.41) | 15  | 2.09 (1.35, 3.24) | 22  | 0.85 (0.42, 1.71) |
| P-trend <sup>e</sup>              |     | 0.56              |     | 0.10              |     | 0.87              |     | 0.90              |     | 0.97              |
| P-hetero                          |     | 0.54              |     | 0.03              |     | Ref               |     | 0.12              |     | Ref               |
| Lithocholic acid                  |     |                   |     |                   |     |                   |     |                   |     |                   |
| Continuous <sup>d</sup>           | 129 | 0.91 (0.78, 1.05) | 111 | 1.01 (0.84, 1.22) | 172 | 1.01 (0.86, 1.19) | 301 | 0.98 (0.82, 1.17) | 325 | 0.98 (0.84, 1.14) |
| Tertile 1                         | 45  | 1.00              | 33  | 1.00              | 59  | 1.00              | 16  | 1.00              | 21  | 1.00              |
| Tertile 2                         | 39  | 0.69 (0.36, 1.34) | 40  | 1.38 (0.75, 2.53) | 55  | 1.23 (0.67, 2.25) | 11  | 0.72 (0.40, 1.28) | 24  | 1.16 (0.62, 2.18) |
| Tertile 3                         | 45  | 0.70 (0.37, 1.31) | 38  | 1.01 (0.53, 1.93) | 58  | 1.24 (0.67, 2.28) | 16  | 0.95 (0.53, 1.70) | 22  | 0.95 (0.50, 1.80) |
| P-trend <sup>e</sup>              |     | 0.53              |     | 0.90              |     | 0.85              |     | 1.00              |     | 0.97              |
| P-hetero                          |     | 0.29              |     | 0.60              |     | Ref               |     | 0.75              |     | Ref               |
| Taurochenodeoxycholic acid        |     |                   |     |                   |     |                   |     |                   |     |                   |
| Continuous <sup>d</sup>           | 129 | 1.13 (0.93, 1.38) | 111 | 0.82 (0.66, 1.03) | 172 | 1.11 (0.93, 1.33) | 301 | 1.12 (0.91, 1.37) | 325 | 1.13 (0.94, 1.35) |
| Tertile 1                         | 33  | 1.00              | 35  | 1.00              | 53  | 1.00              | 13  | 1.00              | 15  | 1.00              |
| Tertile 2                         | 46  | 0.91 (0.47, 1.77) | 40  | 0.54 (0.27, 1.08) | 57  | 2.13 (1.16, 3.94) | 15  | 1.19 (0.68, 2.10) | 25  | 2.01 (1.05, 3.86) |
| Tertile 3                         | 50  | 1.32 (0.71, 2.46) | 36  | 0.69 (0.35, 1.39) | 62  | 1.65 (0.87, 3.11) | 15  | 1.14 (0.65, 1.99) | 27  | 1.69 (0.88, 3.25) |
| P-trend <sup>e</sup>              |     | 0.53              |     | 0.70              |     | 0.85              |     | 0.97              |     | 0.90              |
| P-hetero                          |     | 0.42              |     | 0.12              |     | Ref               |     | 0.91              |     | Ref               |
| Taurocholic acid                  |     |                   |     |                   |     |                   |     |                   |     |                   |
| Continuous <sup>d</sup>           | 129 | 1.09 (0.92, 1.31) | 111 | 0.86 (0.70, 1.06) | 172 | 1.13 (0.96, 1.32) | 301 | 1.06 (0.89, 1.27) | 325 | 1.10 (0.93, 1.29) |
| Tertile 1                         | 35  | 1.00              | 37  | 1.00              | 58  | 1.00              | 14  | 1.00              | 17  | 1.00              |
| Tertile 2                         | 45  | 0.57 (0.29, 1.12) | 39  | 0.31 (0.16, 0.60) | 54  | 2.42 (1.33, 4.41) | 15  | 1.40 (0.79, 2.46) | 26  | 1.84 (0.98, 3.45) |
| Tertile 3                         | 49  | 1.09 (0.59, 2.02) | 35  | 0.47 (0.24, 0.93) | 60  | 1.68 (0.91, 3.09) | 14  | 0.94 (0.54, 1.66) | 24  | 1.26 (0.67, 2.38) |
| P-trend <sup>e</sup>              |     | 0.53              |     | 0.36              |     | 0.85              |     | 0.97              |     | 1.00              |
| P-hetero                          |     | 0.83              |     | 0.03              |     | Ref               |     | 0.65              |     | Ref               |
| Taurodeoxycholic acid             |     |                   |     |                   |     |                   |     |                   |     |                   |
| Continuous <sup>d</sup>           | 129 | 1.05 (0.92, 1.19) | 111 | 0.94 (0.83, 1.07) | 172 | 1.11 (0.98, 1.26) | 301 | 1.15 (0.99, 1.35) | 325 | 1.07 (0.95, 1.21) |
| Tertile 1                         | 42  | 1.00              | 38  | 1.00              | 61  | 1.00              | 12  | 1.00              | 22  | 1.00              |
| Tertile 2                         | 40  | 0.90 (0.47, 1.71) | 33  | 0.62 (0.32, 1.19) | 54  | 1.07 (0.55, 2.06) | 13  | 1.22 (0.71, 2.08) | 23  | 1.27 (0.66, 2.42) |
| Tertile 3                         | 47  | 0.71 (0.36, 1.39) | 40  | 0.45 (0.23, 0.86) | 57  | 1.51 (0.82, 2.81) | 18  | 1.50 (0.88, 2.55) | 22  | 1.07 (0.55, 2.09) |
| P-trend <sup>e</sup>              |     | 0.53              |     | 0.20              |     | 0.85              |     | 0.90              |     | 1.00              |
| P-hetero                          |     | 0.73              |     | 0.12              |     | Ref               |     | 0.57              |     | Ref               |
| Ursodeoxycholic acid              |     |                   |     |                   |     |                   |     |                   |     |                   |
| Continuous <sup>d</sup>           | 129 | 1.10 (0.99, 1.23) | 111 | 0.92 (0.84, 1.01) | 172 | 1.00 (0.92, 1.10) | 301 | 1.09 (0.98, 1.22) | 325 | 0.98 (0.90, 1.07) |
| Tertile 1                         | 35  | 1.00              | 41  | 1.00              | 54  | 1.00              | 11  | 1.00              | 23  | 1.00              |
| Tertile 2                         | 45  | 1.79 (0.98, 3.28) | 35  | 0.70 (0.35, 1.42) | 59  | 0.97 (0.51, 1.85) | 16  | 1.60 (0.98, 2.60) | 21  | 0.76 (0.38, 1.51) |
| Tertile 3                         | 49  | 1.88 (1.04, 3.40) | 35  | 0.62 (0.30, 1.29) | 59  | 1.24 (0.67, 2.30) | 16  | 1.68 (1.04, 2.73) | 23  | 0.96 (0.49, 1.86) |
| P-trend <sup>e</sup>              |     | 0.53              |     | 0.49              |     | 0.85              |     | 0.90              |     | 0.97              |
| P-hetero                          |     | 0.11              |     | 0.49              |     | Ref               |     | 0.07              |     | Ref               |
| Summary scores                    |     |                   |     |                   |     |                   |     |                   |     |                   |
| Total Bile Acids                  |     |                   |     |                   |     |                   |     |                   |     |                   |
| Continuous <sup>d</sup>           | 129 | 1.11 (0.88, 1.40) | 111 | 0.62 (0.48, 0.81) | 172 | 1.26 (1.01, 1.56) | 301 | 1.36 (1.07, 1.74) | 325 | 1.08 (0.86, 1.35) |
| Tertile 1                         | 31  | 1.00              | 35  | 1.00              | 52  | 1.00              | 8   | 1.00              | 19  | 1.00              |
| Tertile 2                         | 43  | 1.08 (0.56, 2.08) | 39  | 0.56 (0.28, 1.12) | 56  | 2.15 (1.15, 4.02) | 16  | 2.31 (1.42, 3.75) | 22  | 1.37 (0.69, 2.72) |
| Tertile 3                         | 55  | 1.53 (0.81, 2.87) | 37  | 0.45 (0.22, 0.92) | 64  | 2.29 (1.21, 4.33) | 19  | 2.84 (1.70, 4.74) | 26  | 1.42 (0.71, 2.84) |
| P-trend <sup>e</sup>              |     | 0.21              |     | 0.07              |     | 0.07              |     | 0.04              |     | 0.31              |
| P-hetero                          |     | 0.95              |     | 0.02              |     | Ref               |     | 0.21              |     | Ref               |
| Primary Bile Acids <sup>f</sup>   |     |                   |     |                   |     |                   |     |                   |     |                   |
| Continuous <sup>d</sup>           | 129 | 1.11 (0.90, 1.37) | 111 | 0.66 (0.52, 0.84) | 172 | 1.14 (0.94, 1.39) | 301 | 1.21 (0.98, 1.51) | 325 | 1.09 (0.90, 1.33) |
| Tertile 1                         | 39  | 1.00              | 36  | 1.00              | 53  | 1.00              | 10  | 1.00              | 17  | 1.00              |
| Tertile 2                         | 38  | 0.78 (0.40, 1.55) | 39  | 0.70 (0.36, 1.36) | 55  | 1.48 (0.77, 2.82) | 13  | 1.33 (0.81, 2.19) | 23  | 1.22 (0.60, 2.44) |
| Tertile 3                         | 52  | 1.42 (0.76, 2.66) | 36  | 0.40 (0.19, 0.85) | 64  | 2.06 (1.09, 3.89) | 20  | 2.46 (1.49, 4.07) | 27  | 1.49 (0.74, 2.97) |
| P-trend <sup>e</sup>              |     | 0.25              |     | 0.07              |     | 0.07              |     | 0.04              |     | 0.31              |
| P-hetero                          |     | 0.60              |     | 0.02              |     | Ref               |     | 0.47              |     | Ref               |
| Secondary Bile Acids <sup>g</sup> |     |                   |     |                   |     |                   |     |                   |     |                   |
| Continuous <sup>d</sup>           | 129 | 0.99 (0.82, 1.20) | 111 | 0.87 (0.72, 1.04) | 172 | 1.26 (1.03, 1.54) | 301 | 1.44 (1.13, 1.83) | 325 | 1.03 (0.86, 1.24) |

|                      |    |                   |    |                   |    |                   |    |                   |    |                   |
|----------------------|----|-------------------|----|-------------------|----|-------------------|----|-------------------|----|-------------------|
| Tertile 1            | 41 | 1.00              | 36 | 1.00              | 61 | 1.00              | 8  | 1.00              | 28 | 1.00              |
| Tertile 2            | 40 | 0.77 (0.40, 1.47) | 35 | 0.81 (0.42, 1.56) | 52 | 1.19 (0.63, 2.25) | 16 | 1.96 (1.26, 3.04) | 16 | 0.65 (0.33, 1.32) |
| Tertile 3            | 48 | 0.64 (0.33, 1.23) | 40 | 0.42 (0.20, 0.85) | 59 | 1.82 (0.99, 3.35) | 19 | 2.45 (1.55, 3.86) | 23 | 0.87 (0.45, 1.68) |
| P-trend <sup>e</sup> |    | 0.21              |    | 0.07              |    | 0.09              |    | 0.04              |    | 0.57              |
| P-hetero             |    | 0.15              |    | 0.03              |    | Ref               |    | 0.04              |    | Ref               |

<sup>a</sup> Covariates in the multivariable logistic regression models included: age at randomization, sex (female or male), intervention arm (control arm or intervention arm), baseline BMI, baseline adenoma characteristics (advanced/multiple or early adenoma), adenoma characteristics at year 1 (advanced/multiple, hyperplastic, early adenoma, or no polyp), education (college graduate vs. post-graduate college), recruitment center (CA, NY/PA/IL/NC/VA, UT), baseline smoking status (current smoker, former smoker, or never regular smoker), family history of colorectal cancer (yes, no, or missing), NSAID/Aspirin use (yes or no), and baseline total energy, alcohol, red/processed meat, and fiber intakes

<sup>b</sup> Left (distal) colon: the largest adenoma was in the splenic flexure, descending, sigmoid, rectum, or rectosigmoid colon.

<sup>c</sup> Right (proximal) colon: the largest adenoma was in the cecum, ascending, hepatic flexure, or transverse colon.

<sup>d</sup> Bile acid concentrations were log<sub>2</sub> transformed.

<sup>e</sup> P-trends were adjusted for multiple testing using False-Discovery Rate correction using the Benjamin-Hochberg method.

<sup>f</sup> Primary Bile Acids = log<sub>2</sub> of the sum chenodeoxycholic acid, cholic acid, glycocholic acid, glycochenodeoxycholic acid, taurocholic acid, and taurochenodeoxycholic acid

<sup>g</sup> Secondary Bile Acids = log<sub>2</sub> of the sum of deoxycholic acid, lithocholic acid, glycodeoxycholic acid, glycolithocholic acid, and taurodeoxycholic acid.

Abbreviations: BMI, Body mass Index; CA, California; CI, confidence interval; IL, Illinois; NC, North Carolina; NY, New York; OR, odds ratios; PA, Pennsylvania; UT, Utah; VA, Virginia; NSAID, non-steroidal anti-inflammatory drug

**Supplemental Table 4.** Effects of strict adherence to the high-fiber, high-fruit and-vegetable, and low-fat diet on circulating bile acid concentrations in the Polyp Prevention Trial, 1991-1998 (N=170 super-compliers and N=198 goal-achieving controls)

| Bile acid concentration, ng/mL | Baseline                   | Year-2                     | Year3                      | Intervention effect, year-2 | Intervention effect, year-3 | P <sup>c</sup> |
|--------------------------------|----------------------------|----------------------------|----------------------------|-----------------------------|-----------------------------|----------------|
|                                | Mean (95% CI) <sup>a</sup> | Mean (95% CI) <sup>a</sup> | Mean (95% CI) <sup>a</sup> | Beta (SE) <sup>b</sup>      | Beta (SE) <sup>b</sup>      |                |
| Chenodeoxycholic acid          |                            |                            |                            |                             |                             |                |
| Super-complier                 | 41.60 (32.80, 52.70)       | 37.64 (29.7, 47.7)         | 41.45 (32.7, 52.5)         | -0.22 (0.2)                 | -0.14 (0.2)                 | 0.97           |
| Goal-achiever                  | 40.21 (32.30, 50.10)       | 42.31 (34.0, 52.7)         | 44.06 (35.4, 54.9)         |                             |                             |                |
| Cholic acid                    |                            |                            |                            |                             |                             |                |
| Super-complier                 | 23.72 (18.5, 30.5)         | 21.40 (16.7, 27.5)         | 20.28 (15.8, 26.0)         | -0.26 (0.2)                 | -0.27 (0.2)                 | 0.87           |
| Goal-achiever                  | 22.90 (18.2, 28.9)         | 24.74 (19.6, 31.2)         | 23.66 (18.8, 29.8)         |                             |                             |                |
| Deoxycholic acid               |                            |                            |                            |                             |                             |                |
| Super-complier                 | 101.33 (85.8, 119.6)       | 107.46 (91.0, 126.8)       | 112.03 (94.9, 132.2)       | 0.16 (0.2)                  | 0.18 (0.2)                  | 0.87           |
| Goal-achiever                  | 112.48 (96.5, 131.2)       | 107.02 (91.8, 124.8)       | 109.52 (93.9, 127.7)       |                             |                             |                |
| Glycochenodeoxycholic acid     |                            |                            |                            |                             |                             |                |
| Super-complier                 | 154.36 (132.6, 179.7)      | 142.55 (122.4, 166.0)      | 151.22 (129.9, 176.1)      | -0.07 (0.1)                 | -0.05 (0.1)                 | 0.99           |
| Goal-achiever                  | 168.84 (146.6, 194.4)      | 163.32 (141.8, 188.1)      | 170.91 (148.4, 196.8)      |                             |                             |                |
| Glycocholic acid               |                            |                            |                            |                             |                             |                |
| Super-complier                 | 46.86 (39.6, 55.5)         | 46.30 (39.1, 54.9)         | 48.58 (41.0, 57.6)         | 0.01 (0.2)                  | -0.02 (0.2)                 | 0.99           |
| Goal-achiever                  | 53.21 (45.5, 62.3)         | 52.35 (44.7, 61.2)         | 55.82 (47.7, 65.3)         |                             |                             |                |
| Glycodeoxycholic acid          |                            |                            |                            |                             |                             |                |
| Super-complier                 | 56.60 (46.5, 68.9)         | 64.87 (53.3, 78.9)         | 67.24 (55.2, 81.8)         | 0.31 (0.2)                  | 0.32 (0.2)                  | 0.87           |
| Goal-achiever                  | 74.31 (61.9, 89.1)         | 68.93 (57.5, 82.7)         | 70.70 (58.9, 84.8)         |                             |                             |                |
| Glycolithocholic acid          |                            |                            |                            |                             |                             |                |
| Super-complier                 | 2.61 (2.1, 3.3)            | 3.02 (2.4, 3.8)            | 3.32 (2.6, 4.2)            | 0.43 (0.3)                  | 0.62 (0.3)                  | 0.59           |
| Goal-achiever                  | 3.79 (3.0, 4.7)            | 3.25 (2.6, 4.0)            | 3.14 (2.5, 3.9)            |                             |                             |                |
| Glycoursodeoxycholic acid      |                            |                            |                            |                             |                             |                |
| Super-complier                 | 19.94 (16.0, 24.8)         | 16.23 (13.1, 20.2)         | 17.86 (14.4, 22.2)         | -0.29 (0.2)                 | -0.24 (0.2)                 | 0.87           |
| Goal-achiever                  | 16.67 (13.6, 20.4)         | 16.54 (13.5, 20.2)         | 17.63 (14.4, 21.6)         |                             |                             |                |
| Lithocholic acid               |                            |                            |                            |                             |                             |                |
| Super-complier                 | 3.30 (2.6, 4.1)            | 3.45 (2.8, 4.3)            | 3.73 (3.0, 4.7)            | 0.04 (0.2)                  | 0.24 (0.2)                  | 0.87           |
| Goal-achiever                  | 4.49 (3.7, 5.5)            | 4.57 (3.7, 5.6)            | 4.29 (3.5, 5.3)            |                             |                             |                |
| Taurochenodeoxycholic acid     |                            |                            |                            |                             |                             |                |
| Super-complier                 | 18.08 (15.1, 21.7)         | 15.64 (13.0, 18.8)         | 17.04 (14.2, 20.5)         | -0.11 (0.2)                 | -0.09 (0.2)                 | 0.99           |
| Goal-achiever                  | 21.26 (18.0, 25.2)         | 19.87 (16.8, 23.5)         | 21.33 (18.0, 25.3)         |                             |                             |                |
| Taurocholic acid               |                            |                            |                            |                             |                             |                |
| Super-complier                 | 5.31 (4.4, 6.4)            | 5.21 (4.3, 6.3)            | 5.48 (4.5, 6.7)            | 0.03 (0.2)                  | -0.03 (0.2)                 | 0.99           |
| Goal-achiever                  | 6.49 (5.4, 7.8)            | 6.23 (5.2, 7.5)            | 6.85 (5.7, 8.2)            |                             |                             |                |
| Taurodeoxycholic acid          |                            |                            |                            |                             |                             |                |
| Super-complier                 | 6.23 (4.7, 8.2)            | 6.65 (5.0, 8.8)            | 6.77 (5.1, 8.9)            | 0.36 (0.3)                  | 0.24 (0.3)                  | 0.87           |
| Goal-achiever                  | 8.37 (6.5, 10.8)           | 6.97 (5.4, 9.0)            | 7.70 (6.0, 9.9)            |                             |                             |                |
| Ursodeoxycholic acid           |                            |                            |                            |                             |                             |                |
| Super-complier                 | 7.59 (5.3, 11.0)           | 5.87 (4.1, 8.5)            | 6.31 (4.4, 9.1)            | -0.56 (0.4)                 | -0.50 (0.4)                 | 0.87           |
| Goal-achiever                  | 4.11 (2.9, 5.8)            | 4.70 (3.3, 6.6)            | 4.84 (3.4, 6.8)            |                             |                             |                |

<sup>a</sup> Means and 95% CIs are least squared means from linear mixed effects models, with a random effect for subject and an interaction term for visit\*intervention arm.

<sup>b</sup> Beta coefficients and standard errors are from linear mixed effects models, with a random effect for subject and an interaction term for visit\*intervention arm.

<sup>c</sup> P-values were estimated using likelihood ratio tests and were adjusted for multiple testing using False-Discovery Rate correction using the Benjamin-Hochberg method

Abbreviations: CI, confidence intervals; SE, standard error

**Supplemental Table 5.** Effects of strict adherence to the high-fiber, high-fruit and-vegetable, and low-fat diet on circulating total bile acids concentrations by baseline participant characteristics in the Polyp Prevention Trial, 1991-1998 (N=170 super-compliers and N=198 goal-achieving controls)

|                                               | Baseline                   | Year-2                     | Year-3                     | Intervention effect, Year-2  | Intervention effect, Year-3  | P <sup>c</sup> | P-<br>interaction |
|-----------------------------------------------|----------------------------|----------------------------|----------------------------|------------------------------|------------------------------|----------------|-------------------|
|                                               | Mean (95% CI) <sup>a</sup> | Mean (95% CI) <sup>a</sup> | Mean (95% CI) <sup>a</sup> | Beta Coef. (SE) <sup>b</sup> | Beta Coef. (SE) <sup>b</sup> |                |                   |
| Age                                           |                            |                            |                            |                              |                              |                | 0.14              |
| > 62                                          |                            |                            |                            |                              |                              |                |                   |
| Super-complier                                | 730 (589.8, 902.9)         | 553 (447.1, 684.4)         | 618 (499.8, 765.2)         | -0.31 (0.2)                  | -0.17 (0.2)                  | 0.93           |                   |
| Goal-achiever                                 | 792 (674.2, 930.9)         | 742 (631.5, 871.9)         | 758 (644.8, 890.3)         |                              |                              |                |                   |
| < 62                                          |                            |                            |                            |                              |                              |                |                   |
| Super-complier                                | 673 (573.4, 789.3)         | 721 (614.3, 845.6)         | 740 (631.0, 868.6)         | -0.11 (0.2)                  | -0.10 (0.2)                  | 0.99           |                   |
| Goal-achiever                                 | 686 (573.7, 820.5)         | 794 (663.9, 949.4)         | 809 (676.6, 967.6)         |                              |                              |                |                   |
| Sex                                           |                            |                            |                            |                              |                              |                | 0.90              |
| Male                                          |                            |                            |                            |                              |                              |                |                   |
| Super-complier                                | 729 (624.1, 852.3)         | 716 (612.3, 836.2)         | 731 (625.4, 854.1)         | -0.01 (0.2)                  | -0.07 (0.2)                  | 0.99           |                   |
| Goal-achiever                                 | 827 (713.5, 958.3)         | 819 (706.8, 949.3)         | 869 (750.2, 1007.4)        |                              |                              |                |                   |
| Female                                        |                            |                            |                            |                              |                              |                |                   |
| Super-complier                                | 644 (516.7, 802.2)         | 561 (450.6, 699.6)         | 632 (507.6, 788.1)         | -0.30 (0.2)                  | -0.07 (0.2)                  | 0.93           |                   |
| Goal-achiever                                 | 647 (530.6, 787.8)         | 692 (568.2, 843.6)         | 669 (548.9, 815.0)         |                              |                              |                |                   |
| Body mass index                               |                            |                            |                            |                              |                              |                | 0.52              |
| Normal weight (18.5-24.99 kg/m <sup>2</sup> ) |                            |                            |                            |                              |                              |                |                   |
| Super-complier                                | 681 (467.6, 991.9)         | 684 (469.9, 996.7)         | 590 (405.3, 859.8)         | 0.19 (0.4)                   | -0.27 (0.4)                  | 0.93           |                   |
| Goal-achiever                                 | 637 (471.7, 859.4)         | 561 (415.5, 757.1)         | 667 (494.4, 900.7)         |                              |                              |                |                   |
| Overweight (25-29.99 kg/m <sup>2</sup> )      |                            |                            |                            |                              |                              |                |                   |
| Super-complier                                | 927 (457.1, 1879.3)        | 620 (305.9, 1257.4)        | 714 (352.0, 1447.3)        | -0.58 (0.6)                  | -0.61 (0.6)                  | 0.93           |                   |
| Goal-achiever                                 | 834 (514.6, 1351.6)        | 835 (515.5, 1354.1)        | 978 (603.3, 1584.6)        |                              |                              |                |                   |
| Obese (> 30 kg/m <sup>2</sup> )               |                            |                            |                            |                              |                              |                |                   |
| Super-complier                                | 686 (532.7, 883.0)         | 633 (491.8, 815.1)         | 698 (541.9, 898.2)         | -0.22 (0.2)                  | -0.13 (0.2)                  | 0.93           |                   |
| Goal-achiever                                 | 772 (609.4, 977.6)         | 831 (656.0, 1052.4)        | 859 (678.2, 1087.9)        |                              |                              |                |                   |
| Smoking status                                |                            |                            |                            |                              |                              |                | 0.50              |
| Smoker                                        |                            |                            |                            |                              |                              |                |                   |
| Super-complier                                | 705 (593.4, 836.5)         | 602 (507.2, 714.9)         | 676 (569.6, 802.9)         | -0.24 (0.2)                  | -0.07 (0.2)                  | 0.93           |                   |
| Goal-achiever                                 | 757 (645.7, 888.3)         | 765 (652.2, 897.3)         | 764 (651.2, 896.0)         |                              |                              |                |                   |
| Non-smoker                                    |                            |                            |                            |                              |                              |                |                   |
| Super-complier                                | 683 (562.4, 830.2)         | 708 (582.5, 859.9)         | 706 (581.2, 858.0)         | -0.00 (0.2)                  | -0.07 (0.2)                  | 0.99           |                   |
| Goal-achiever                                 | 734 (612.9, 878.2)         | 762 (636.3, 911.6)         | 795 (664.6, 952.2)         |                              |                              |                |                   |
| Baseline adenoma characteristics              |                            |                            |                            |                              |                              |                | 0.44              |
| Early adenoma                                 |                            |                            |                            |                              |                              |                |                   |
| Super-complier                                | 740 (616.0, 889.5)         | 631 (525.1, 758.2)         | 739 (615.0, 888.0)         | -0.15 (0.2)                  | 0.04 (0.2)                   | 0.93           |                   |
| Goal-achiever                                 | 716 (603.8, 848.1)         | 675 (569.6, 800.1)         | 696 (587.0, 824.6)         |                              |                              |                |                   |
| Advanced or multiple adenomas                 |                            |                            |                            |                              |                              |                |                   |
| Super-complier                                | 663 (555.2, 792.2)         | 665 (556.4, 793.9)         | 657 (550.4, 785.4)         | -0.12 (0.2)                  | -0.15 (0.2)                  | 0.93           |                   |
| Goal-achiever                                 | 769 (651.7, 906.3)         | 834 (707.3, 983.7)         | 845 (716.5, 996.5)         |                              |                              |                |                   |
| Baseline fiber intake                         |                            |                            |                            |                              |                              |                | 0.70              |
| Fiber intake > 11.4 g/1,000 kcal/day          |                            |                            |                            |                              |                              |                |                   |
| Super-complier                                | 614 (503.9, 747.8)         | 606 (497.3, 737.9)         | 610 (500.9, 743.3)         | 0.02 (0.2)                   | -0.06 (0.2)                  | 0.99           |                   |
| Goal-achiever                                 | 718 (607.2, 848.6)         | 699 (591.0, 826.0)         | 745 (630.2, 880.9)         |                              |                              |                |                   |
| Fiber intake ≤ 11.4 g/1,000 kcal/day          |                            |                            |                            |                              |                              |                |                   |
| Super-complier                                | 769 (649.9, 909.7)         | 690 (583.0, 816.0)         | 765 (646.3, 904.7)         | -0.28 (0.2)                  | -0.08 (0.2)                  | 0.93           |                   |
| Goal-achiever                                 | 780 (658.3, 924.9)         | 847 (714.7, 1004.1)        | 821 (692.3, 972.6)         |                              |                              |                |                   |
| Baseline fat intake                           |                            |                            |                            |                              |                              |                | 0.54              |
| Fat intake > 34.7 g/1,000 kcal/day            |                            |                            |                            |                              |                              |                |                   |
| Super-complier                                | 730 (610.8, 871.9)         | 635 (531.8, 759.2)         | 706 (590.6, 843.1)         | -0.24 (0.2)                  | -0.08 (0.2)                  | 0.93           |                   |
| Goal-achiever                                 | 705 (588.9, 844.0)         | 723 (603.7, 865.2)         | 723 (604.0, 865.5)         |                              |                              |                |                   |

|                                                         |                      |                     |                     |             |             |      |      |
|---------------------------------------------------------|----------------------|---------------------|---------------------|-------------|-------------|------|------|
| Fat intake $\leq$ 34.7 g/1,000 kcal/day                 |                      |                     |                     |             |             |      |      |
| Super-complier                                          | 654 (541.9, 789.0)   | 669 (554.2, 807.0)  | 672 (557.2, 811.3)  | 0.00 (0.2)  | -0.04 (0.2) | 0.99 |      |
| Goal-achiever                                           | 783 (667.2, 917.7)   | 800 (681.9, 937.9)  | 830 (707.5, 973.1)  |             |             |      |      |
| Baseline fruit-vegetable intake                         |                      |                     |                     |             |             |      | 0.74 |
| Fruits-vegetable intake > 2.8 svgs./1,000 kcal/day      |                      |                     |                     |             |             |      |      |
| Super-complier                                          | 651 (535.5, 792.5)   | 640 (525.9, 778.3)  | 675 (555.1, 821.6)  | 0.00 (0.2)  | -0.02 (0.2) | 0.99 |      |
| Goal-achiever                                           | 732 (615.5, 871.5)   | 719 (604.0, 855.2)  | 771 (648.2, 917.8)  |             |             |      |      |
| Fruits-vegetable intake $\leq$ 2.8 svgs./1,000 kcal/day |                      |                     |                     |             |             |      |      |
| Super-complier                                          | 736 (621.1, 871.8)   | 660 (557.2, 782.1)  | 704 (594.5, 834.5)  | -0.26 (0.2) | -0.11 (0.2) | 0.93 |      |
| Goal-achiever                                           | 761 (645.6, 896.4)   | 815 (691.6, 960.2)  | 787 (668.0, 927.5)  |             |             |      |      |
| Intervention fiber goals met                            |                      |                     |                     |             |             |      | 0.81 |
| Fiber goals met                                         |                      |                     |                     |             |             |      |      |
| Super-complier                                          | 675 (571.1, 798.2)   | 637 (539.0, 753.3)  | 690 (583.7, 815.8)  | -0.11 (0.4) | 0.35 (0.4)  | 0.93 |      |
| Goal-achiever                                           | 656 (392.3, 1095.8)  | 667 (399.4, 1115.5) | 526 (314.6, 878.8)  |             |             |      |      |
| Fiber goals unmet                                       |                      |                     |                     |             |             |      |      |
| Super-complier                                          | 734 (591.3, 910.9)   | 677 (545.5, 840.4)  | 691 (556.7, 857.6)  | -0.15 (0.2) | -0.17 (0.2) | 0.93 |      |
| Goal-achiever                                           | 752 (667.3, 847.7)   | 770 (683.2, 867.8)  | 799 (708.8, 900.4)  |             |             |      |      |
| Intervention fat goals met                              |                      |                     |                     |             |             |      | 0.27 |
| Fat goals met                                           |                      |                     |                     |             |             |      |      |
| Super-complier                                          | 670 (581.5, 771.0)   | 598 (519.7, 689.1)  | 700 (607.7, 805.8)  | -0.05 (0.3) | 0.54 (0.3)  | 0.93 |      |
| Goal-achiever                                           | 1034 (740.1, 1444.9) | 958 (685.7, 1338.7) | 745 (533.4, 1041.4) |             |             |      |      |
| Fat goals unmet                                         |                      |                     |                     |             |             |      |      |
| Super-complier                                          | 723 (591.4, 884.6)   | 714 (583.9, 873.3)  | 680 (556.0, 831.6)  | -0.06 (0.2) | -0.20 (0.2) | 0.93 |      |
| Goal-achiever                                           | 725 (634.2, 828.2)   | 748 (654.8, 855.1)  | 782 (684.2, 893.5)  |             |             |      |      |
| Intervention fruit-vegetable goals met                  |                      |                     |                     |             |             |      | 0.29 |
| Fruits-vegetables goals met                             |                      |                     |                     |             |             |      |      |
| Super-complier                                          | 709 (616.5, 816.3)   | 658 (571.9, 757.2)  | 741 (643.8, 852.4)  | -0.07 (0.2) | -0.00 (0.2) | 0.99 |      |
| Goal-achiever                                           | 729 (552.7, 961.7)   | 710 (537.9, 935.9)  | 763 (578.3, 1006.2) |             |             |      |      |
| Fruits-vegetables goals unmet                           |                      |                     |                     |             |             |      |      |
| Super-complier                                          | 617 (443.9, 856.5)   | 609 (438.6, 846.1)  | 467 (336.4, 649.0)  | -0.07 (0.2) | -0.46 (0.2) | 0.93 |      |
| Goal-achiever                                           | 750 (657.1, 855.6)   | 776 (680.3, 885.9)  | 783 (685.8, 893.1)  |             |             |      |      |

<sup>a</sup> Means and 95% CIs are least squared means from linear mixed effects models, with a random effect for subject and an interaction term for visit\*intervention arm.

<sup>b</sup> Beta coefficients and standard errors are from linear mixed effects models, with a random effect for subject and an interaction term for visit\*intervention arm.

<sup>c</sup> P-values were estimated using likelihood ratio tests and were adjusted for multiple testing using false-discovery rate correction using the Benjamin-Hochberg method

Abbreviations: CI, confidence intervals; SE, standard error

**Supplemental Table 6.** Associations<sup>a</sup> of bile acid concentrations with rectal tissue microbiome relative abundances at baseline (N=65)

| Bile acid, ng/mL                  | Relative abundance of <i>a priori</i> -selected bacteria <sup>b</sup> |                      |                      |                   |                           |                |                   |                      |                  |               |
|-----------------------------------|-----------------------------------------------------------------------|----------------------|----------------------|-------------------|---------------------------|----------------|-------------------|----------------------|------------------|---------------|
|                                   | <i>Bacteroides</i>                                                    | <i>Fusobacterium</i> | <i>Porphyromonas</i> | <i>Parvimonas</i> | <i>Peptostreptococcus</i> | <i>Gemella</i> | <i>Prevotella</i> | <i>Solobacterium</i> | <i>Dialister</i> | Clostridiales |
|                                   | Rs; P                                                                 | Rs; P                | Rs; P                | Rs; P             | Rs; P                     | Rs; P          | Rs; P             | Rs; P                | Rs; P            | Rs; P         |
| Chenodeoxycholic acid             | 0.04; 0.74                                                            | 0.09; 0.47           | -0.11; 0.39          | 0.08; 0.54        | 0.08; 0.53                | 0.06; 0.63     | -0.04; 0.76       | 0.18; 0.16           | -0.19; 0.13      | -0.25; 0.05   |
| Cholic acid                       | -0.01; 0.95                                                           | 0.01; 0.96           | -0.04; 0.77          | 0.06; 0.62        | 0.06; 0.67                | 0.04; 0.78     | 0.05; 0.72        | 0.21; 0.10           | -0.20; 0.11      | -0.11; 0.40   |
| Deoxycholic acid                  | 0.11; 0.41                                                            | 0.14; 0.27           | -0.13; 0.31          | -0.02; 0.89       | -0.07; 0.61               | 0.002; 0.99    | -0.22; 0.09       | -0.02; 0.88          | -0.12; 0.34      | -0.21; 0.09   |
| Glycochenodeoxycholic acid        | 0.21; 0.10                                                            | -0.03; 0.81          | -0.08; 0.52          | 0.005; 0.97       | -0.05; 0.69               | -0.001; 0.99   | 0.04; 0.78        | -0.05; 0.71          | 0.03; 0.84       | -0.10; 0.43   |
| Glycocholic acid                  | 0.22; 0.08                                                            | -0.06; 0.65          | -0.09; 0.48          | -0.05; 0.69       | -0.11; 0.38               | -0.05; 0.68    | 0.06; 0.66        | -0.13; 0.32          | 0.08; 0.53       | -0.16; 0.20   |
| Glycodeoxycholic acid             | 0.20; 0.12                                                            | 0.03; 0.84           | -0.15; 0.25          | -0.10; 0.45       | -0.18; 0.17               | -0.07; 0.59    | -0.11; 0.38       | -0.19; 0.13          | 0.02; 0.88       | -0.20; 0.11   |
| Glycolithocholic acid             | -0.01; 0.91                                                           | -0.18; 0.16          | -0.18; 0.16          | -0.07; 0.57       | -0.11; 0.40               | -0.07; 0.60    | -0.11; 0.40       | 0.05; 0.72           | -0.07; 0.61      | 0.10; 0.42    |
| Glycoursodeoxycholic acid         | 0.16; 0.22                                                            | -0.05; 0.70          | -0.15; 0.26          | -0.11; 0.41       | -0.12; 0.36               | -0.10; 0.42    | -0.09; 0.49       | -0.18; 0.16          | 0.04; 0.77       | -0.12; 0.35   |
| Lithocholic acid                  | -0.22; 0.09                                                           | 0.11; 0.39           | 0.04; 0.76           | 0.11; 0.38        | 0.09; 0.47                | 0.14; 0.28     | -0.09; 0.50       | 0.18; 0.15           | -0.13; 0.29      | -0.05; 0.70   |
| Taurochenodeoxycholic acid        | 0.30; 0.02                                                            | -0.10; 0.46          | -0.07; 0.61          | -0.03; 0.81       | -0.05; 0.71               | -0.03; 0.82    | 0.07; 0.59        | -0.05; 0.68          | 0.10; 0.43       | -0.20; 0.11   |
| Taurocholic acid                  | 0.27; 0.03                                                            | -0.03; 0.84          | -0.01; 0.95          | 0.05; 0.72        | 0.04; 0.76                | 0.04; 0.77     | 0.15; 0.24        | 0.02; 0.89           | 0.12; 0.34       | -0.23; 0.07   |
| Taurodeoxycholic acid             | 0.28; 0.02                                                            | -0.01; 0.93          | -0.12; 0.36          | -0.11; 0.39       | -0.15; 0.24               | -0.08; 0.53    | -0.02; 0.87       | -0.17; 0.19          | 0.12; 0.35       | -0.26; 0.04   |
| Ursodeoxycholic acid              | 0.07; 0.58                                                            | 0.09; 0.48           | -0.12; 0.33          | -0.04; 0.73       | -0.03; 0.80               | -0.05; 0.71    | -0.13; 0.29       | -0.02; 0.86          | -0.12; 0.36      | -0.20; 0.11   |
| <i>Summary scores</i>             |                                                                       |                      |                      |                   |                           |                |                   |                      |                  |               |
| Total bile acids                  | 0.21; 0.10                                                            | -0.02; 0.90          | -0.17; 0.17          | -0.05; 0.67       | -0.10; 0.42               | -0.05; 0.68    | -0.09; 0.50       | 0.01; 0.95           | -0.10; 0.45      | -0.20; 0.11   |
| Primary bile acids <sup>c</sup>   | 0.02; 0.88                                                            | 0.06; 0.67           | -0.09; 0.47          | 0.07; 0.59        | 0.07; 0.59                | 0.05; 0.71     | -0.01; 0.92       | 0.19; 0.13           | -0.20; 0.12      | -0.21; 0.09   |
| Secondary bile acids <sup>d</sup> | 0.11; 0.38                                                            | 0.13; 0.33           | -0.15; 0.24          | -0.03; 0.83       | -0.07; 0.58               | -0.01; 0.95    | -0.24; 0.06       | -0.02; 0.87          | -0.11; 0.38      | -0.21; 0.10   |

<sup>a</sup> Spearman correlations were adjusted for age and sex.

<sup>b</sup> Bacterial relative abundance mean and standard deviation (SD): *Bacteroides* 15.88 (13.14), *Fusobacterium* 0.35 (0.78), *Porphyromonas* 0.19 (0.41), *Parvimonas* 0.02 (0.08), *Peptostreptococcus* 0.03 (0.09), *Gemella* 0.14 (0.57), *Prevotella* 0.36 (1.03), *Solobacterium* 0.01 (0.04), *Dialister* 0.39 (0.71), Clostridiales (order) 48.23 (18.85).

<sup>c</sup> Primary Bile Acids = log<sub>2</sub> of the sum chenodeoxycholic acid, cholic acid, glycocholic acid, glycochenodeoxycholic acid, taurocholic acid, and taurochenodeoxycholic acid

<sup>d</sup> Secondary Bile Acids = log<sub>2</sub> of the sum of deoxycholic acid, lithocholic acid, glycodeoxycholic acid, glycolithocholic acid, and taurodeoxycholic acid.
